# Supplementary material
Source: PubMed Central journal article supplement (PMC2765817)

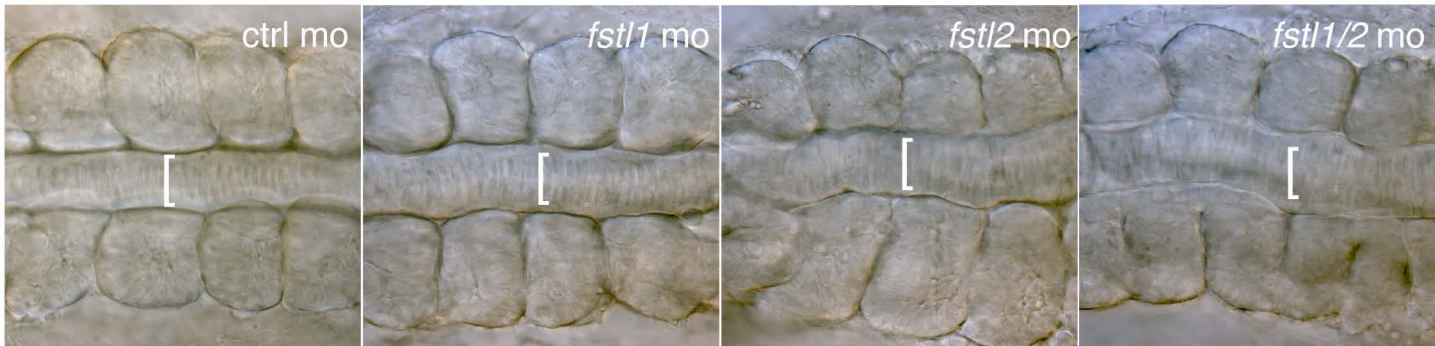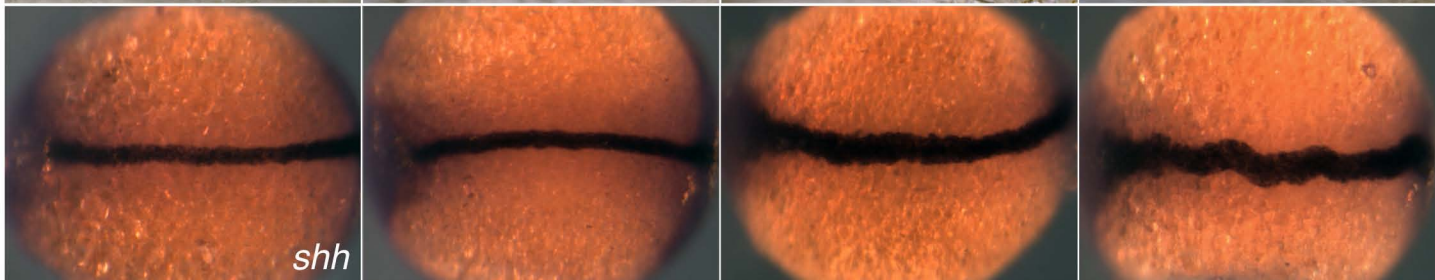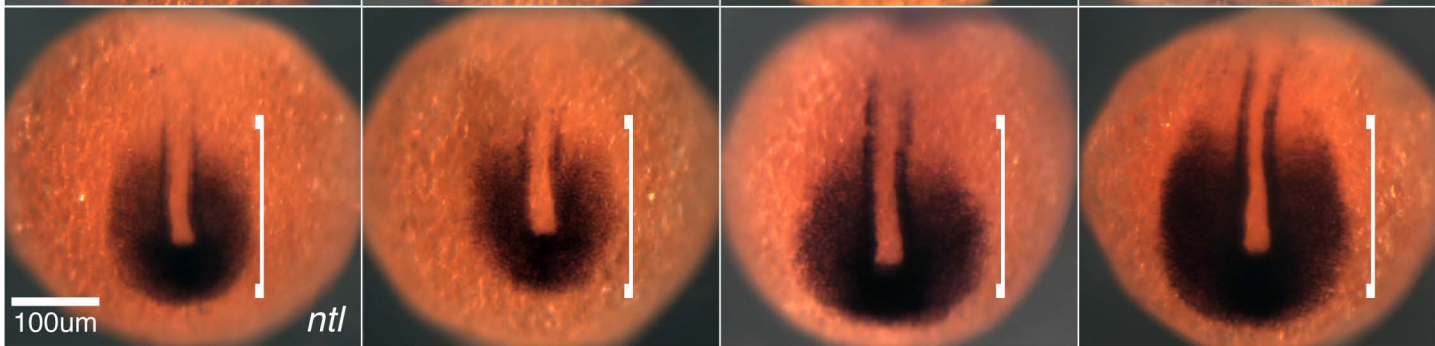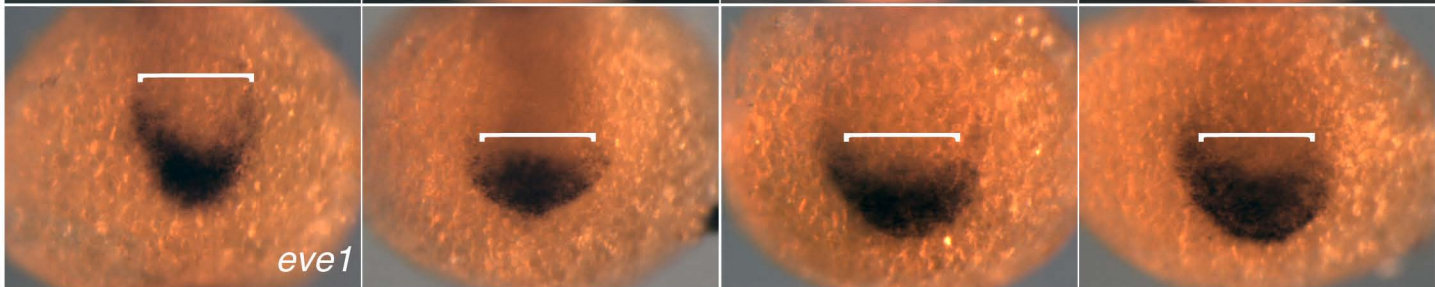

Supplement: NIHMS117237-supplement-suppl_fig_2.pdf [file NIHMS117237-supplement-suppl_fig_2.pdf]

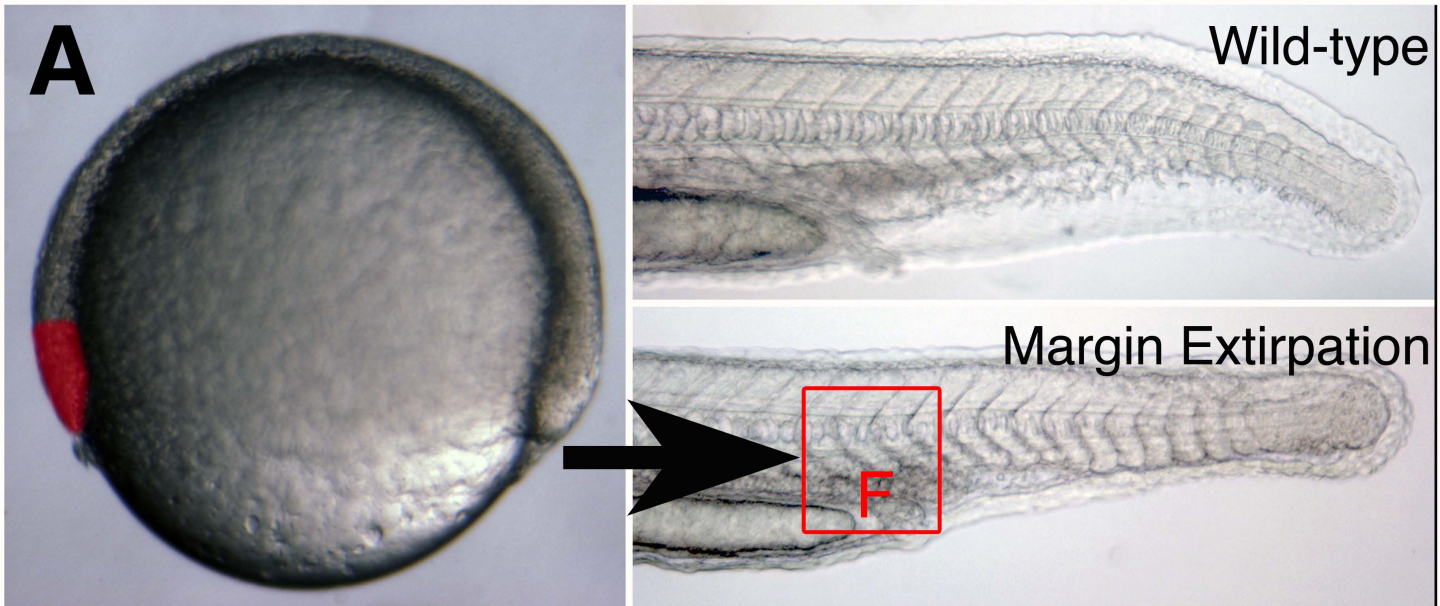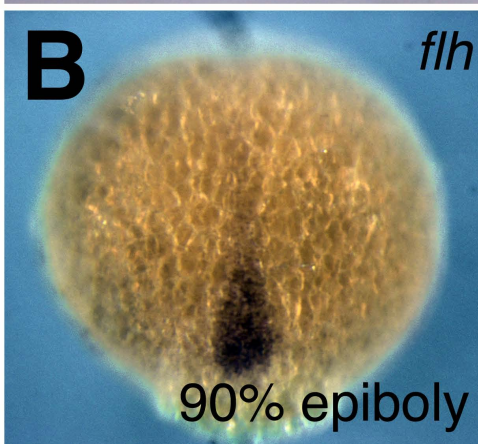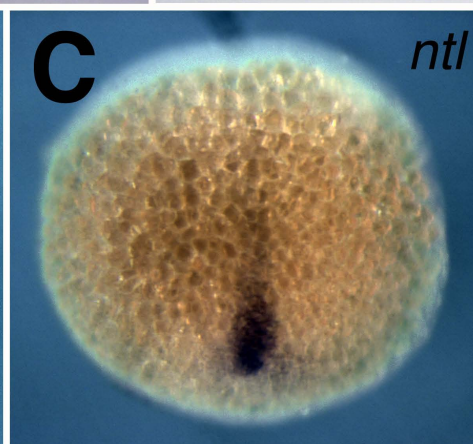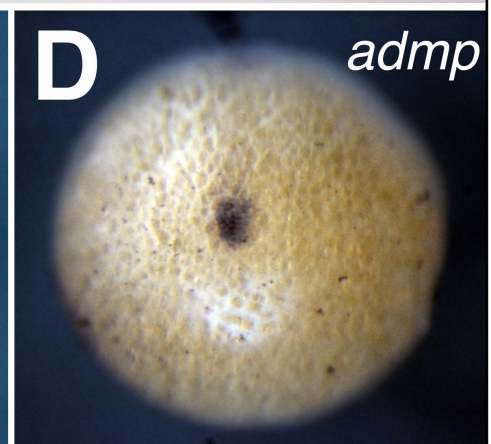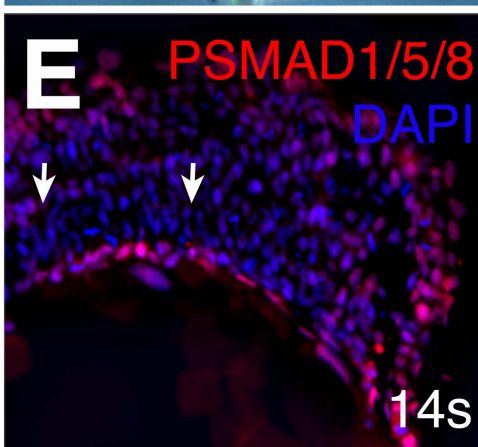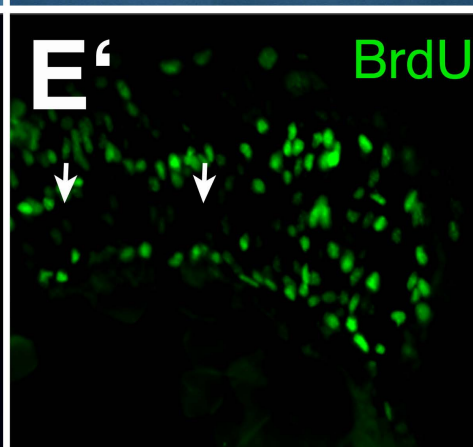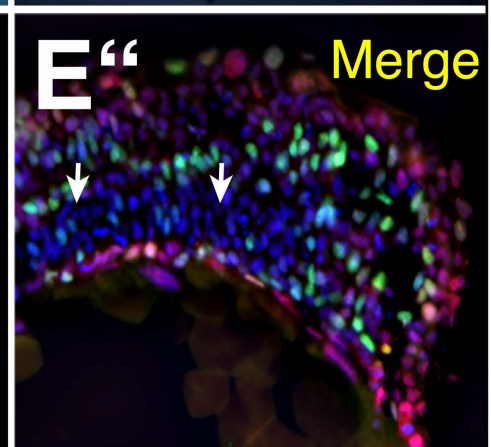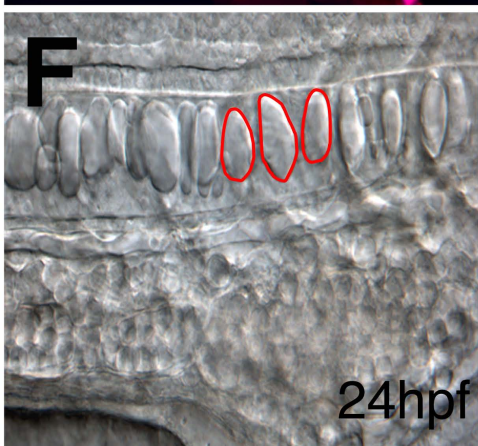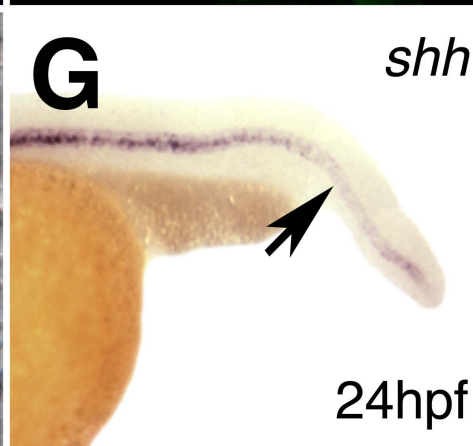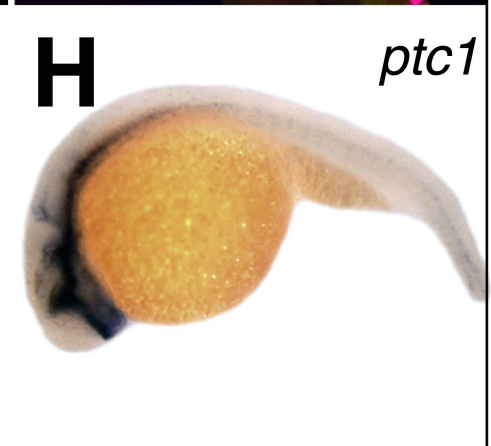

Supplement: NIHMS117237-supplement-suppl_fig_4.pdf [file NIHMS117237-supplement-suppl_fig_4.pdf]

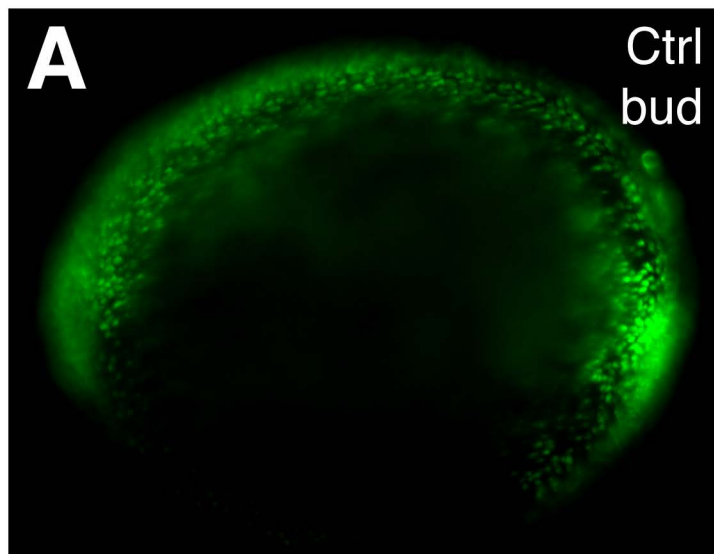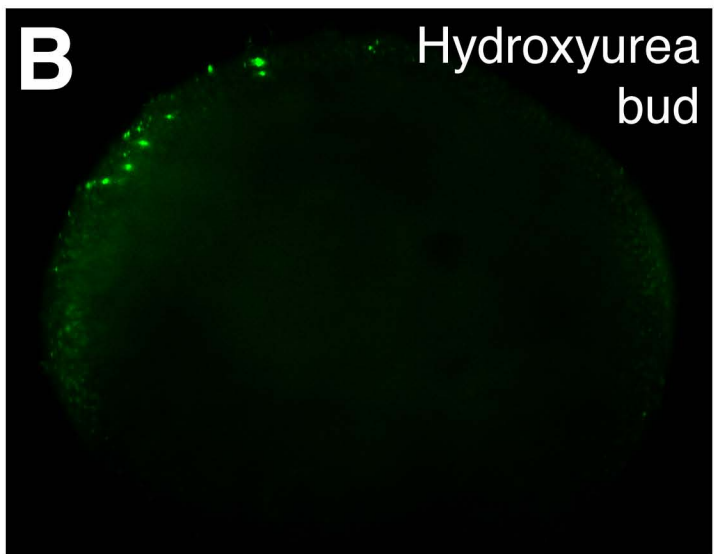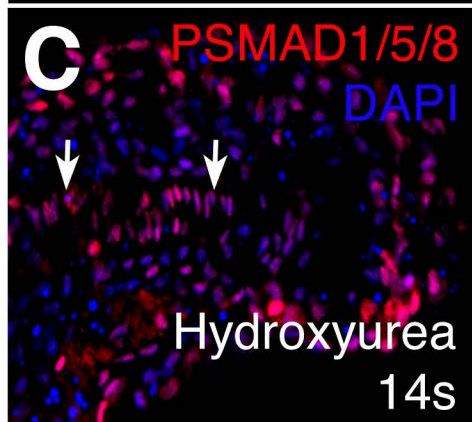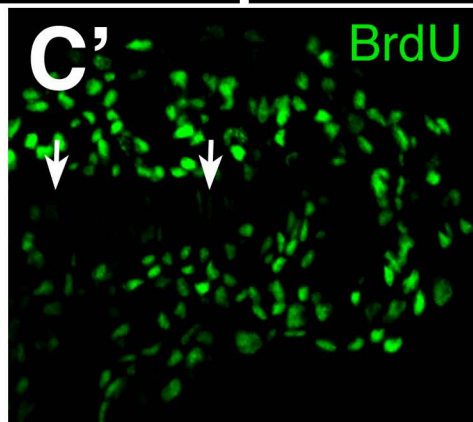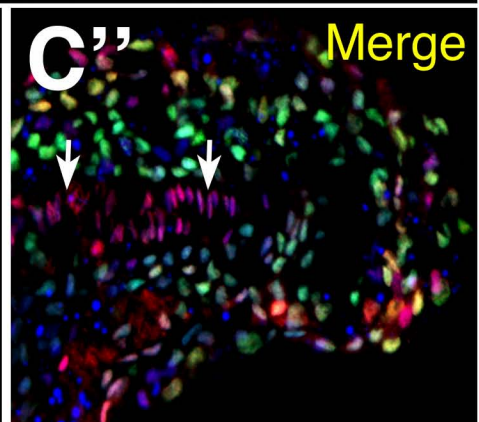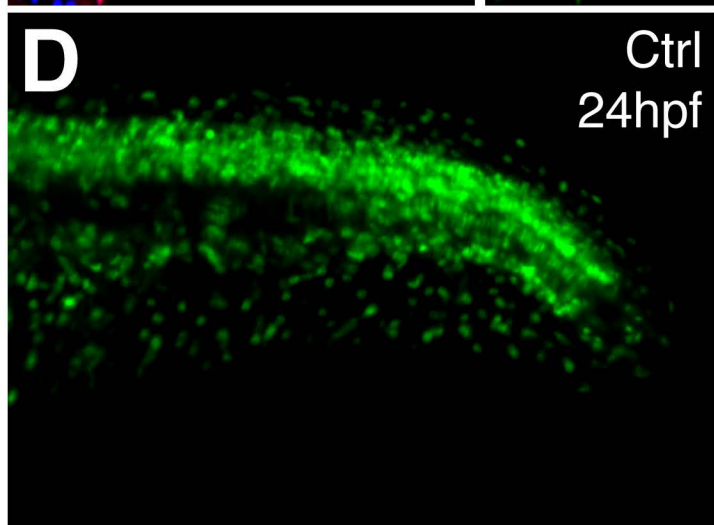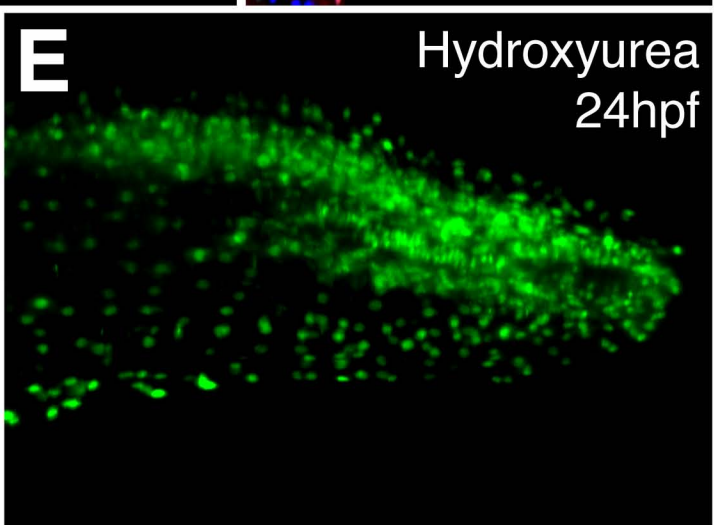

Supplement: NIHMS117237-supplement-suppl_fig_5.pdf [file NIHMS117237-supplement-suppl_fig_5.pdf]

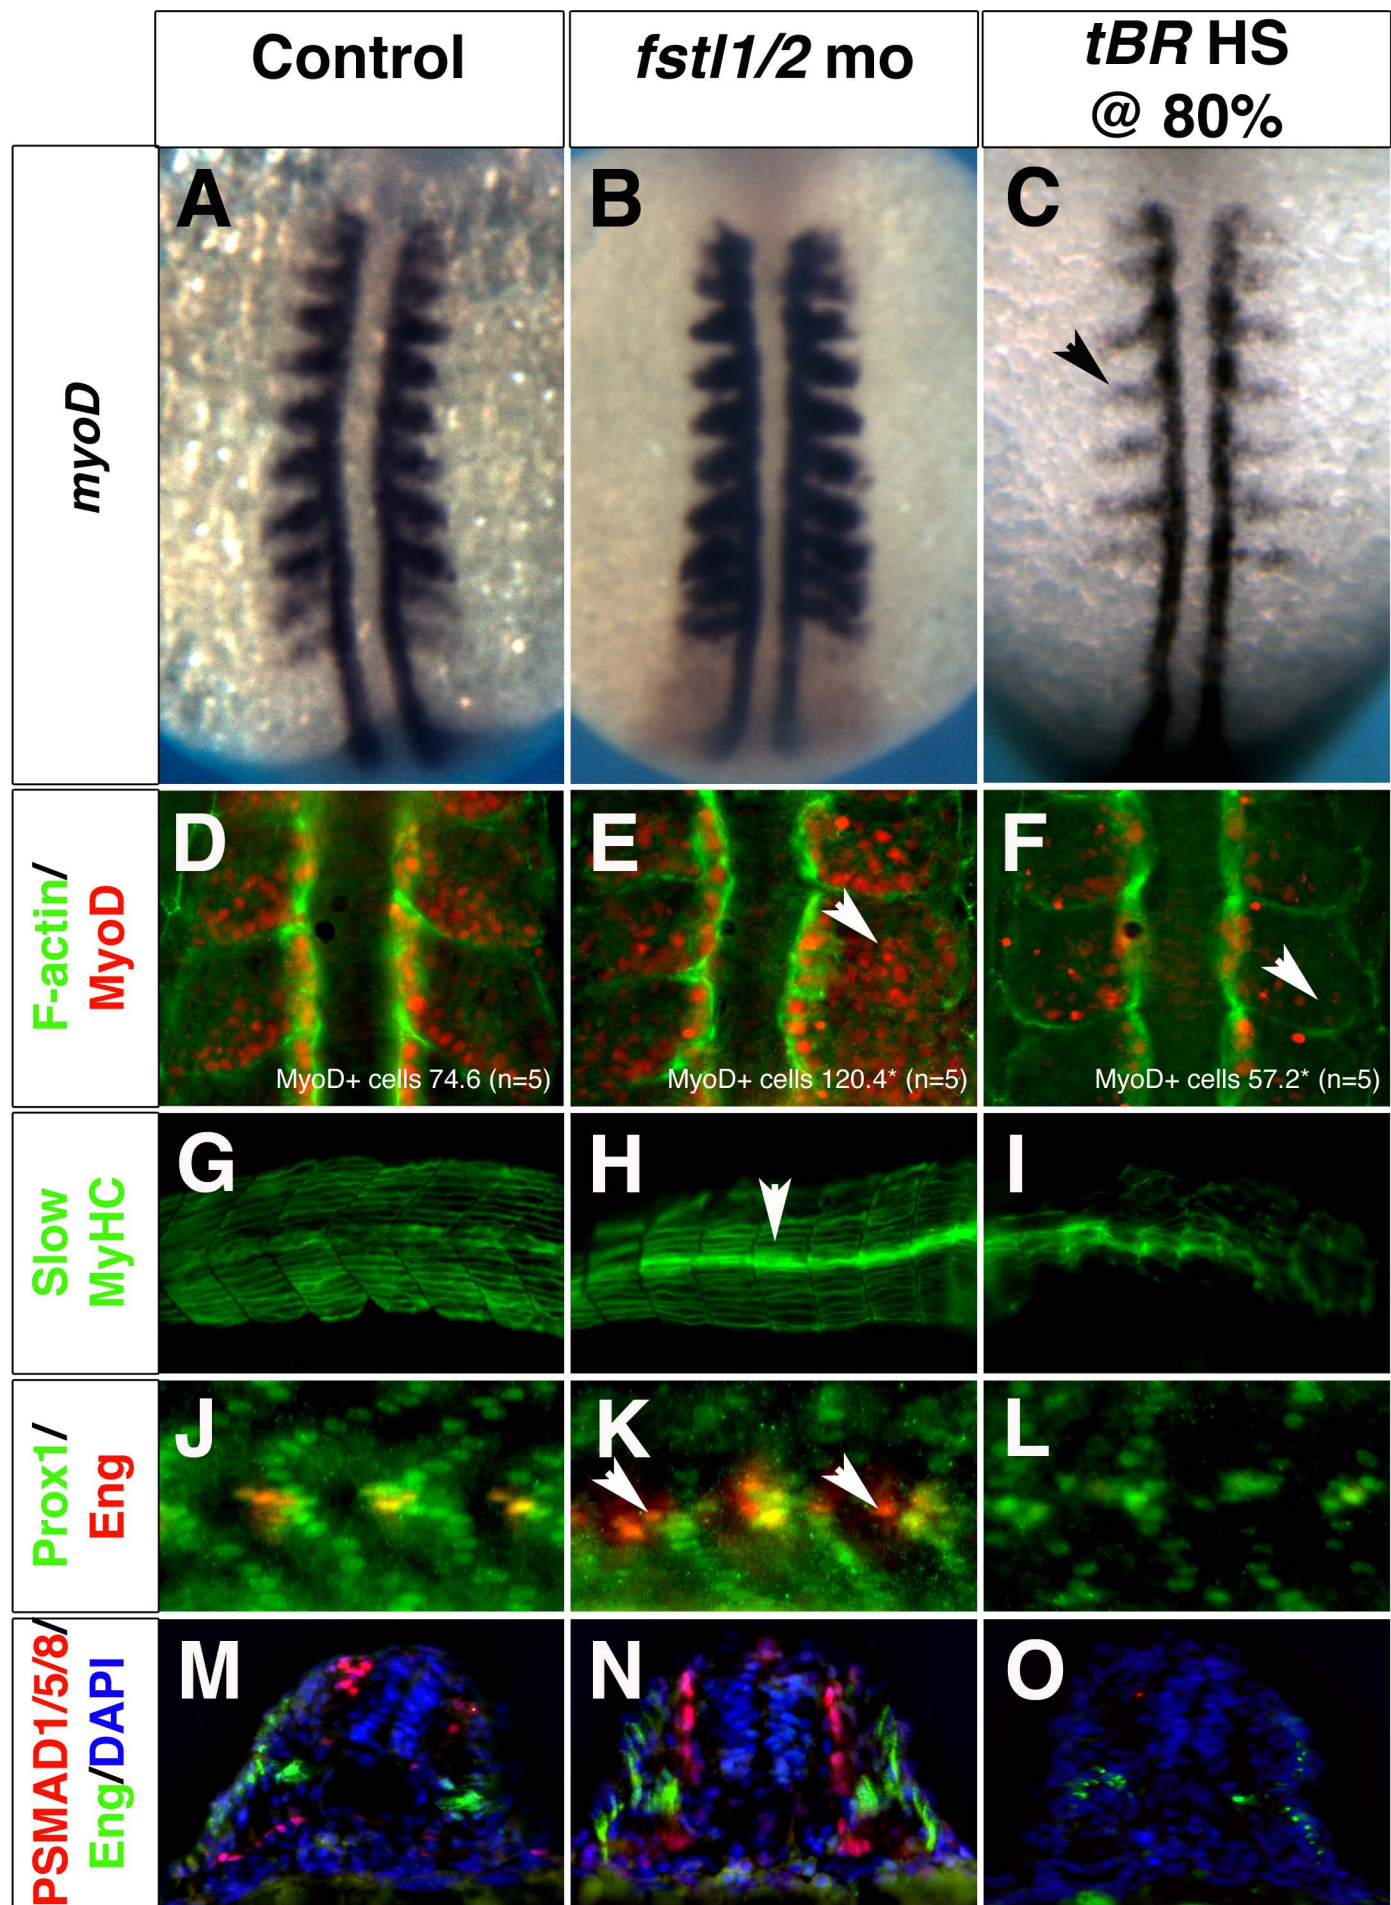

Supplement: NIHMS117237-supplement-suppl_fig_7.pdf [file NIHMS117237-supplement-suppl_fig_7.pdf]
